# Supplementary material
Source: Springer Nature journal article supplement (https://www.springermedizin.de/resource/supplementary/13006_2005_4_MOESM2_ESM.pdf/9627818)

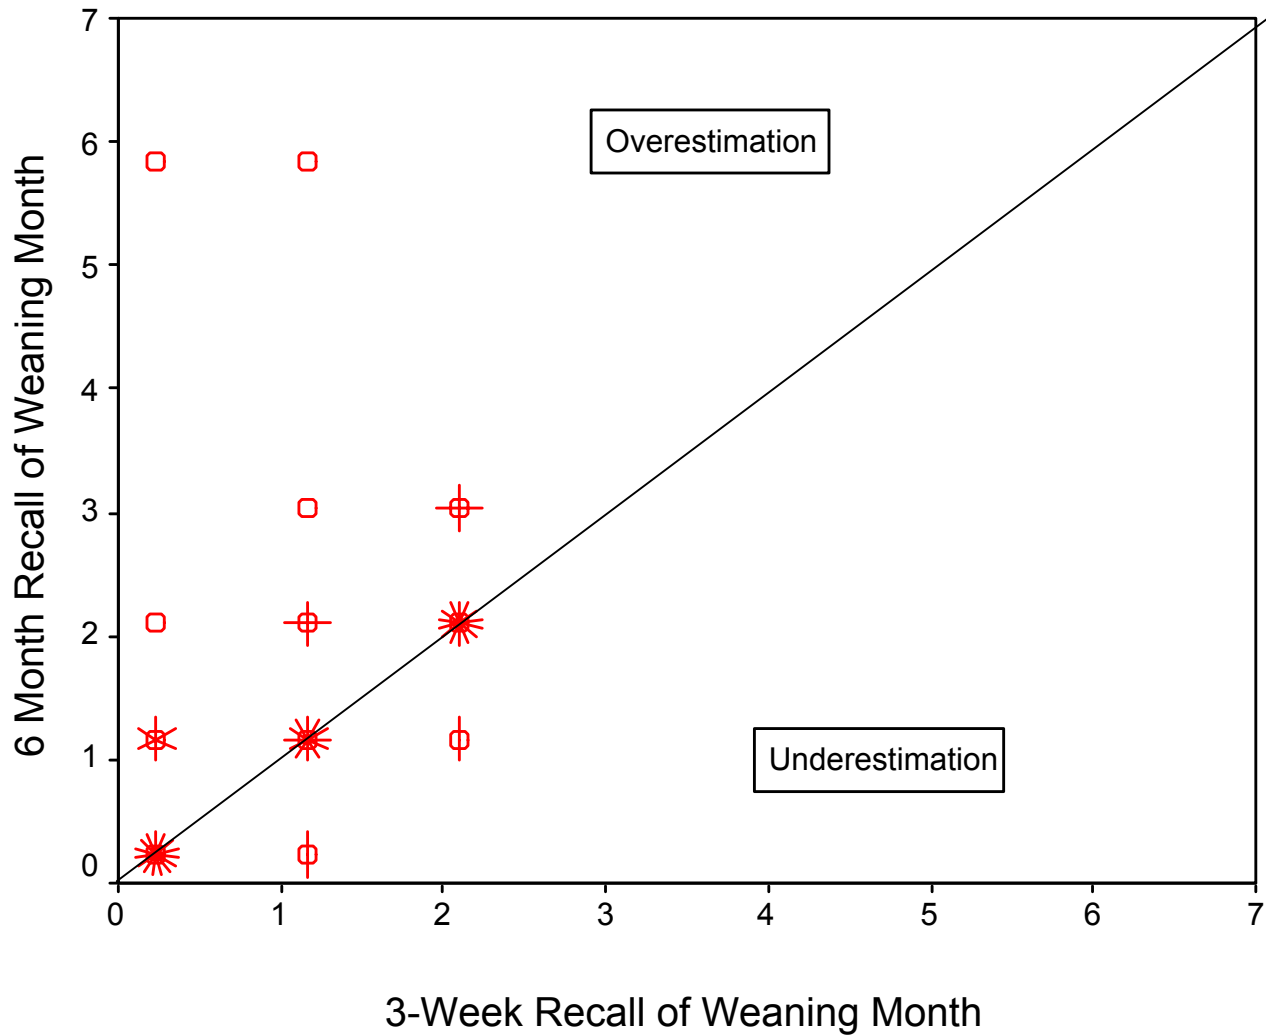

Supplement: MOESM2 [file 9627818]
